# Supplementary material for: The odorant metabolizing enzyme UGT2A1: Immunolocalization and impact of the modulation of its activity on the olfactory response
Source: PubMed Central journal article supplement (PMC7993815; doi:10.1371/journal.pone.0249029), 2021-03-25
Supplement: pone.0249029.s003.pdf [file pone.0249029.s003.pdf]

Neiers et al. The odorant metabolizing enzyme UGT2A1: Immunolocalization and impact of the modulation of its activity on the olfactory response

Table 1 : ElectroOlfactoGram amplitude data

|        | Before saline solution              |                                | After saline solution               |                                |                                          |                                     | Before Beta-Glucuronidase treatment |                                | After Beta-Glucuronidase treatment  |                                |                                          |                                     |
|--------|-------------------------------------|--------------------------------|-------------------------------------|--------------------------------|------------------------------------------|-------------------------------------|-------------------------------------|--------------------------------|-------------------------------------|--------------------------------|------------------------------------------|-------------------------------------|
|        | Net Amyl Acetate Response Amplitude | Net Eugenol Response Amplitude | Net Amyl Acetate Response Amplitude | Net Eugenol Response Amplitude | After/Before Amyl Acetate Response Ratio | After/Before Eugenol Response Ratio | Net Amyl Acetate Response Amplitude | Net Eugenol Response Amplitude | Net Amyl Acetate Response Amplitude | Net Eugenol Response Amplitude | After/Before Amyl Acetate Response Ratio | After/Before Eugenol Response Ratio |
| Rat 1  | 1,05                                | 2,27                           | 1,09                                | 2,35                           | 1,04                                     | 1,04                                | 1,03                                | 2,83                           | 0,19                                | 1,44                           | 0,19                                     | 0,51                                |
| Rat 2  | 0,75                                | 1,53                           | 0,87                                | 1,68                           | 1,15                                     | 1,10                                | 3,78                                | 3,27                           | 2,83                                | 3,90                           | 0,75                                     | 1,19                                |
| Rat 3  | 1,27                                | 1,65                           | 1,25                                | 1,44                           | 0,98                                     | 0,87                                | 1,83                                | 2,04                           | 2,18                                | 2,56                           | 1,19                                     | 1,25                                |
| Rat 4  | 1,26                                | 4,46                           | 0,97                                | 2,57                           | 0,77                                     | 0,58                                | 2,73                                | 2,71                           | 2,44                                | 3,49                           | 0,89                                     | 1,29                                |
| Rat 5  | 2,49                                | 2,18                           | 1,13                                | 1,35                           | 0,45                                     | 0,62                                | 1,04                                | 1,94                           | 0,32                                | 1,82                           | 0,30                                     | 0,93                                |
| Rat 6  | 0,71                                | 2,02                           | 1,38                                | 3,06                           | 1,94                                     | 1,51                                | 0,72                                | 1,94                           | 0,52                                | 2,60                           | 0,73                                     | 1,34                                |
| Rat 7  | 1,94                                | 2,09                           | 0,83                                | 1,18                           | 0,43                                     | 0,56                                | 1,65                                | 2,53                           | 2,59                                | 1,32                           | 1,57                                     | 0,52                                |
| Rat 8  | 1,74                                | 2,23                           | 2,47                                | 2,38                           | 1,43                                     | 1,07                                | 7,29                                | 2,54                           | 3,90                                | 2,94                           | 0,53                                     | 1,16                                |
| Rat 9  | 2,91                                | 4,07                           | 1,74                                | 2,80                           | 0,60                                     | 0,69                                | 4,21                                | 2,48                           | 4,49                                | 2,69                           | 1,07                                     | 1,09                                |
| Rat 10 | 3,69                                | 3,79                           | 2,59                                | 3,66                           | 0,70                                     | 0,97                                | 0,78                                | 3,87                           | 1,72                                | 3,70                           | 2,19                                     | 0,96                                |
| Rat 11 | 2,38                                | 2,76                           | 0,04                                | 1,60                           | 0,02                                     | 0,58                                | 2,74                                | 0,70                           | 1,52                                | 1,12                           | 0,55                                     | 1,59                                |
| Rat 12 | Uncomplete stimulation sequence     |                                |                                     |                                |                                          |                                     | 0,97                                | 1,15                           | 0,46                                | 1,80                           | 0,47                                     | 1,56                                |
| Rat 13 | 2,29                                | 3,98                           | 0,78                                | 1,93                           | 0,34                                     | 0,48                                | 3,24                                | 2,33                           | 1,60                                | 2,32                           | 0,49                                     | 0,99                                |
| Rat 14 | 1,69                                | 2,73                           | 2,50                                | 4,69                           | 1,48                                     | 1,72                                | 0,33                                | 2,36                           | 0,07                                | 3,34                           | 0,22                                     | 1,42                                |
| Rat 15 | Uncomplete stimulation sequence     |                                |                                     |                                |                                          |                                     | 1,46                                | 0,40                           | -0,08                               | 1,86                           | -0,05                                    | 4,69                                |
| Rat 16 | 1,42                                | 2,82                           | 0,28                                | 2,80                           | 0,20                                     | 0,99                                | 3,10                                | 2,62                           | 3,10                                | 3,59                           | 1,00                                     | 1,37                                |
| Rat 17 | 2,58                                | 2,90                           | 2,48                                | 1,42                           | 0,96                                     | 0,49                                | 1,04                                | 3,14                           | 0,64                                | 2,20                           | 0,61                                     | 0,70                                |
| Rat 18 | 3,73                                | 3,07                           | 3,15                                | 2,06                           | 0,84                                     | 0,67                                | 4,10                                | 3,11                           | 3,36                                | 3,44                           | 0,82                                     | 1,11                                |
| Rat 18 | 2,18                                | 2,70                           | 1,18                                | 1,69                           | 0,54                                     | 0,62                                | Uncomplete stimulation sequence     |                                |                                     |                                |                                          |                                     |
| Rat 19 | 0,78                                | 2,90                           | 2,00                                | 3,24                           | 2,55                                     | 1,12                                | 2,06                                | 1,99                           | 3,32                                | 3,52                           | 1,61                                     | 1,77                                |
| Rat 19 | 1,97                                | 1,66                           | 0,94                                | 2,11                           | 0,48                                     | 1,27                                | 5,57                                | 4,20                           | 2,63                                | 2,91                           | 0,47                                     | 0,69                                |

NB : Values in gray cells are discarded outliers.
